# Supplementary material for: Expeditious fabrication of flower-like hierarchical mesoporous carbon superstructures as supercapacitor electrode materials
Source: Royal Society of Chemistry journal article supplement (doi:10.1039/c4ta03209h), 2014-01-01
Supplement: c4ta03209h1.pdf [file c4ta03209h1.pdf]

**Supplementary Information**  
**Expeditious Fabrication of Flower-like Hierarchical Mesoporous Carbon**  
**Superstructures as Supercapacitor Electrode Materials**

Jiyuan Liang, Shenglan Chen, Mingjiang Xie, Yongzheng Wang, Xiangke Guo,

Xuefeng Guo\* and Weiping Ding\*

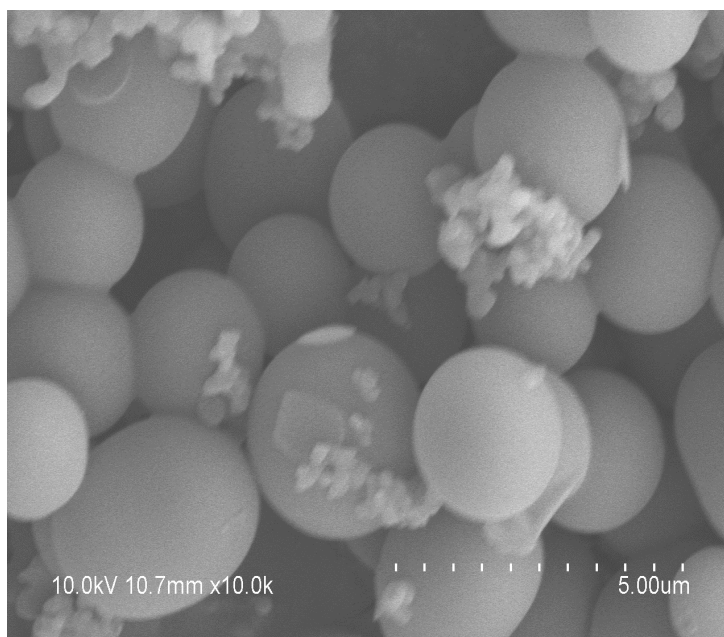

**Fig. S1** SEM image of carbon sphere

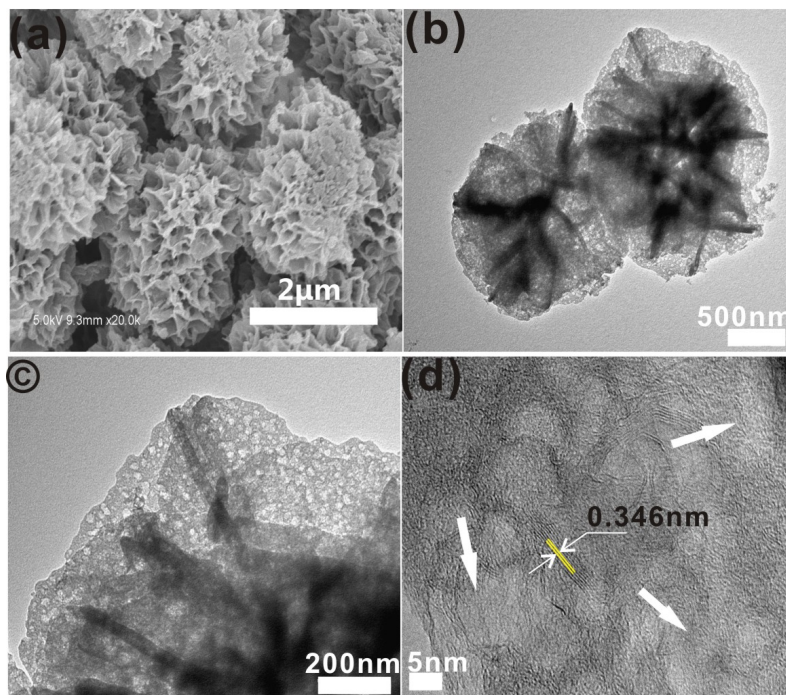

**Fig. S2** (a) SEM, (b,c) TEM and (d) HRTEM images of FMCS-2

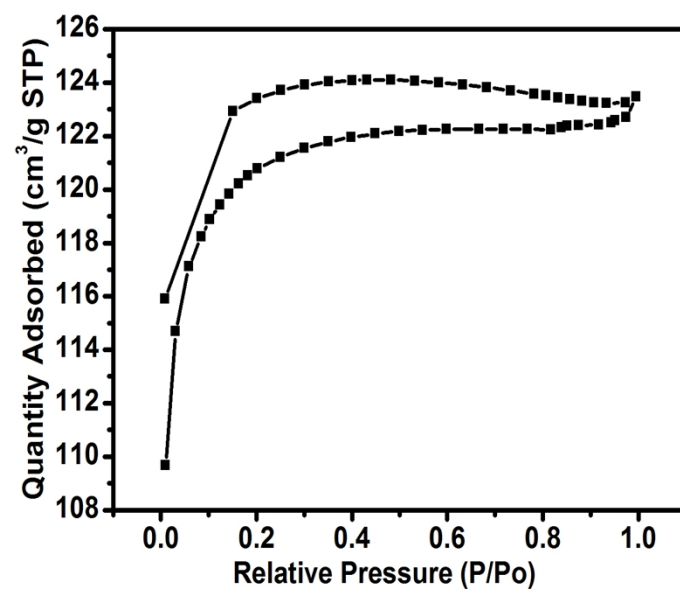

Fig. S3 Nitrogen adsorption-desorption isotherms of carbon sphere

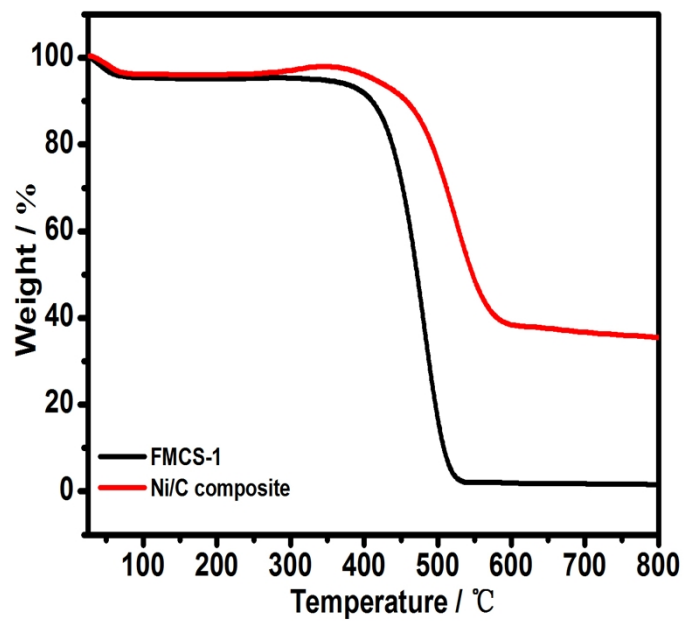

Fig. S4 TG curves of Ni/C composite and FMCS-1.

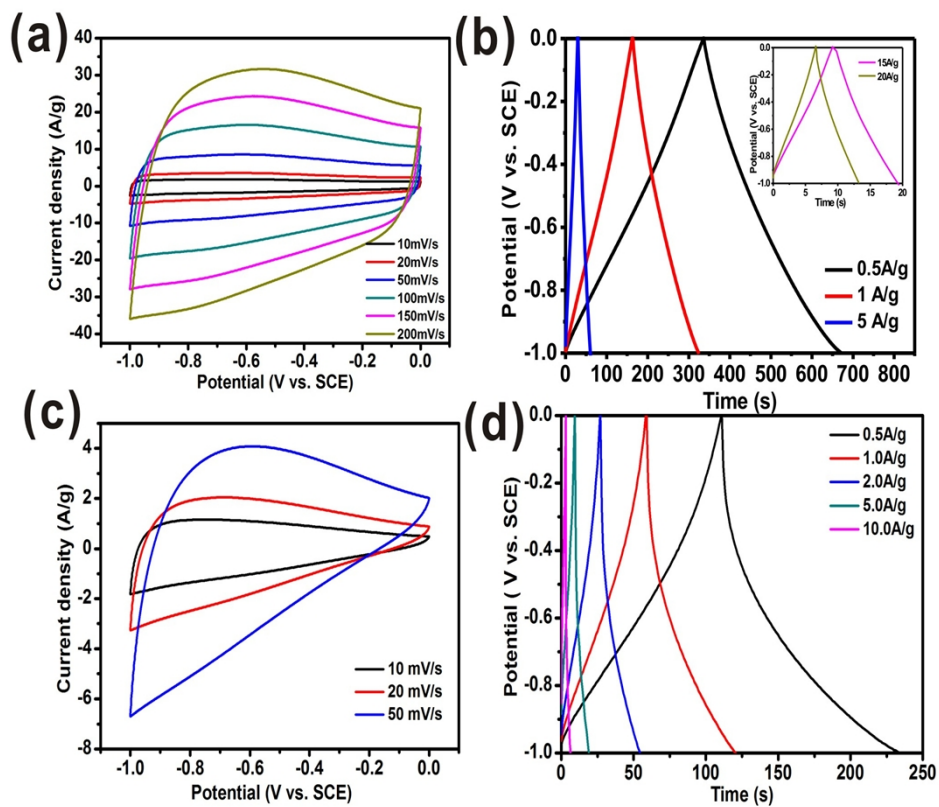

**Fig. S5** Cyclic voltammograms of FMCS-2 (a) and carbon sphere (c) based electrodes at various scan rates. Charge/discharge curves of FMCS-2 (b) and carbon sphere (d) based electrodes at various current densities.
